# Supplementary material for: Renewable linear alpha-olefins by base-catalyzed dehydration of biologically-derived fatty alcohols
Source: Royal Society of Chemistry journal article supplement (doi:10.1039/d1gc00243k), 2021-01-01
Supplement: d1gc00243k1.xlsx [file d1gc00243k1.xlsx]

## Sheet: Tables S52-S53
Table S52. Discounted cash flow analysis of the production process at the baseline fermentation performance scenario.
	Depreciable capital [MM$]	Fixed capital investment [MM$]	Working capital [MM$]	Depreciation [MM$]	Loan [MM$]	Loan interest payment [MM$]	Loan payment [MM$]	Loan principal [MM$]	Annual operating cost (excluding depreciation) [MM$]	Sales [MM$]	Tax [MM$]	Incentives [MM$]	Net earnings [MM$]	Cash flow [MM$]	Discount factor	Net present value (NPV) [MM$]	Cumulative NPV [MM$]	Net earnings	Cash flow	Net present value (NPV)	Cumulative NPV
2014	37.4679	67.4423	0	0	26.9769	2.15815	0	29.1351	0	0	0	0	0	-40.4654	2.42	-48.9631	-48.9631	0	-40.4654	-97.9262	-97.9262
2015	281.01	505.817	0	0	202.327	18.517	0	249.979	0	0	0	0	0	-303.49	2.2	-333.839	-382.802	0	-303.49	-667.679	-765.605
2016	149.872	269.769	42.1514	0	124.768	29.9798	0	404.727	0	0	0	0	0	-187.152	2	-187.152	-569.955	0	-187.152	-374.305	-1139.91
2017	0	0	0	61.2596	0	32.3782	60.3163	376.789	328.256	411.411	0	0	-38.4199	22.8396	1.81818	20.7633	-549.192	-38.4199	22.8396	41.5266	-1098.38
2018	0	0	0	105.412	0	30.1431	60.3163	346.616	348.794	470.185	0	0	-44.3379	61.0739	1.65289	50.4743	-498.717	-44.3379	61.0739	100.949	-997.435
2019	0	0	0	76.0999	0	27.7293	60.3163	314.029	348.794	470.185	2.98933	0	-18.0154	58.0845	1.50263	43.6398	-455.078	-15.026	61.0739	91.7714	-905.663
2020	0	0	0	55.1022	0	25.1223	60.3163	278.835	348.794	470.185	10.2444	0	-4.27276	50.8294	1.36603	34.7172	-420.36	3.88159	58.9838	80.5734	-825.09
2021	0	0	0	40.0937	0	22.3068	60.3163	240.825	348.794	470.185	15.4101	0	5.57006	45.6638	1.24184	28.3536	-392.007	13.6371	53.7308	66.7252	-758.364
2022	0	0	0	39.8221	0	19.266	60.3163	199.775	348.794	470.185	15.4246	0	5.82715	45.6493	1.12895	25.7678	-366.239	13.8136	53.6358	60.552	-697.812
2023	0	0	0	39.6501	0	15.982	60.3163	155.441	348.794	470.185	15.4101	0	6.01368	45.6638	1.02632	23.4328	-342.806	13.9254	53.5756	54.9855	-642.827
2024	0	0	0	20.9217	0	12.4353	60.3163	107.56	348.794	470.185	21.8961	0	18.256	39.1777	0.933015	18.2767	-324.529	26.0989	47.0206	43.8709	-598.956
2025	0	0	0	23.993	0	8.60479	60.3163	55.8484	348.794	470.185	28.3677	0	8.71314	32.7062	0.848195	13.8706	-310.659	24.1025	48.0956	40.7945	-558.162
2026	0	0	0	2.39877	0	4.46787	60.3163	3.61367e-07	348.794	470.185	28.3677	0	30.3074	32.7062	0.771087	12.6097	-298.049	38.1388	40.5376	31.258	-526.904
2027	0	0	0	2.3993	0	0	0	0	348.794	470.185	47.0546	0	71.9362	74.3355	0.700988	26.0541	-271.995	77.344	79.7433	55.8991	-471.005
2028	0	0	0	2.39877	0	0	0	0	348.794	470.185	47.0546	0	71.9367	74.3355	0.637262	23.6856	-248.309	77.3444	79.7432	50.8173	-420.187
2029	0	0	0	2.3993	0	0	0	0	348.794	470.185	47.0546	0	71.9362	74.3355	0.579329	21.5323	-226.777	77.344	79.7433	46.1976	-373.99
2030	0	0	0	2.39877	0	0	0	0	348.794	470.185	47.0546	0	71.9367	74.3355	0.526663	19.5749	-207.202	77.3444	79.7432	41.9977	-331.992
2031	0	0	0	2.3993	0	0	0	0	348.794	470.185	47.0546	0	71.9362	74.3355	0.478784	17.7953	-189.407	77.344	79.7433	38.1798	-293.812
2032	0	0	0	2.39877	0	0	0	0	348.794	470.185	47.0546	0	71.9367	74.3355	0.435258	16.1776	-173.229	77.3444	79.7432	34.7089	-259.103
2033	0	0	0	2.3993	0	0	0	0	348.794	470.185	47.0546	0	71.9362	74.3355	0.395689	14.7069	-158.522	77.344	79.7433	31.5536	-227.55
2034	0	0	0	2.39877	0	0	0	0	348.794	470.185	47.0546	0	71.9367	74.3355	0.359718	13.3699	-145.152	77.3444	79.7432	28.685	-198.865
2035	0	0	0	2.3993	0	0	0	0	348.794	470.185	47.0546	0	71.9362	74.3355	0.327016	12.1545	-132.998	77.344	79.7433	26.0773	-172.787
2036	0	0	0	2.39877	0	0	0	0	348.794	470.185	47.0546	0	71.9367	74.3355	0.297287	11.0495	-121.949	77.3444	79.7432	23.7066	-149.081
2037	0	0	0	1.19965	0	0	0	0	348.794	470.185	47.0546	0	73.1359	74.3355	0.270261	10.045	-111.904	78.1238	79.3235	21.4381	-127.643
2038	0	0	0	0	0	0	0	0	348.794	470.185	47.0546	0	74.3355	74.3355	0.245692	9.13182	-102.772	78.9036	78.9036	19.386	-108.257
2039	0	0	0	0	0	0	0	0	348.794	470.185	47.0546	0	74.3355	74.3355	0.223356	8.30165	-94.4701	78.9036	78.9036	17.6236	-90.633
2040	0	0	0	0	0	0	0	0	348.794	470.185	47.0546	0	74.3355	74.3355	0.203051	7.54696	-86.9231	78.9036	78.9036	16.0215	-74.6115
2041	0	0	0	0	0	0	0	0	348.794	470.185	47.0546	0	74.3355	74.3355	0.184592	6.86087	-80.0622	78.9036	78.9036	14.565	-60.0465
2042	0	0	0	0	0	0	0	0	348.794	470.185	47.0546	0	74.3355	74.3355	0.167811	6.23715	-73.8251	78.9036	78.9036	13.2409	-46.8057
2043	0	0	0	0	0	0	0	0	348.794	470.185	47.0546	0	74.3355	74.3355	0.152555	5.67014	-68.1549	78.9036	78.9036	12.0372	-34.7685
2044	0	0	0	0	0	0	0	0	348.794	470.185	47.0546	0	74.3355	74.3355	0.138687	5.15467	-63.0003	78.9036	78.9036	10.9429	-23.8256
2045	0	0	0	0	0	0	0	0	348.794	470.185	47.0546	0	74.3355	74.3355	0.126079	4.68607	-58.3142	78.9036	78.9036	9.94807	-13.8775
2046	0	0	-42.1514	0	0	0	0	0	348.794	470.185	47.0546	0	74.3355	116.487	0.114617	6.6757	-51.6385	78.9036	121.055	13.875	-0.00257305
Table S53. Discounted cash flow analysis of the production process at the target fermentation performance scenario.
	Depreciable capital [MM$]	Fixed capital investment [MM$]	Working capital [MM$]	Depreciation [MM$]	Loan [MM$]	Loan interest payment [MM$]	Loan payment [MM$]	Loan principal [MM$]	Annual operating cost (excluding depreciation) [MM$]	Sales [MM$]	Tax [MM$]	Incentives [MM$]	Net earnings [MM$]	Cash flow [MM$]	Discount factor	Net present value (NPV) [MM$]	Cumulative NPV [MM$]	Net earnings	Cash flow	Net present value (NPV)	Cumulative NPV
2014	7.32315	13.1817	0	0	5.27267	0.421813	0	5.69448	0	0	0	0	0	-7.909	2.42	-9.56989	-9.56989	0	-7.909	-19.1398	-19.1398
2015	54.9236	98.8625	0	0	39.545	3.61916	0	48.8586	0	0	0	0	0	-59.3175	2.2	-65.2492	-74.8191	0	-59.3175	-130.498	-149.638
2016	29.2926	52.7267	8.23854	0	24.3861	5.85958	0	79.1043	0	0	0	0	0	-36.5791	2	-36.5791	-111.398	0	-36.5791	-73.1582	-222.796
2017	0	0	0	10.657	0	6.32834	11.7889	73.6437	152.093	162.877	0	0	-11.6616	-1.0046	1.81818	-0.913269	-112.312	-11.6616	-1.0046	-1.82654	-224.623
2018	0	0	0	18.446	0	5.8915	11.7889	67.7464	161.754	186.145	0.673836	0	-6.51771	11.9283	1.65289	9.85813	-102.453	-5.84388	12.6022	20.83	-203.793
2019	0	0	0	13.5235	0	5.41971	11.7889	61.3772	161.754	186.145	2.35311	0	-3.27442	10.2491	1.50263	7.70028	-94.7531	-0.921315	12.6022	18.9364	-184.857
2020	0	0	0	9.98142	0	4.91018	11.7889	54.4985	161.754	186.145	3.55258	0	-0.931829	9.04959	1.36603	6.18099	-88.5721	1.70349	11.6849	15.9619	-168.895
2021	0	0	0	7.43463	0	4.35988	11.7889	47.0695	161.754	186.145	4.40661	0	0.760933	8.19556	1.24184	5.0888	-83.4833	3.35891	10.7935	13.4039	-155.491
2022	0	0	0	7.32934	0	3.76556	11.7889	39.0462	161.754	186.145	4.40901	0	0.863819	8.19316	1.12895	4.62483	-78.8585	3.42734	10.7567	12.1437	-143.347
2023	0	0	0	7.2449	0	3.1237	11.7889	30.3811	161.754	186.145	4.40661	0	0.950664	8.19556	1.02632	4.20562	-74.6529	3.48223	10.7271	11.0094	-132.338
2024	0	0	0	4.09691	0	2.43048	11.7889	21.0227	161.754	186.145	5.47895	0	3.02631	7.12323	0.933015	3.32304	-71.3298	5.52842	9.62533	8.98058	-123.357
2025	0	0	0	10.2616	0	1.68181	11.7889	10.9156	161.754	186.145	6.54888	0	-4.20828	6.05329	0.848195	2.56719	-68.7626	1.52139	11.783	9.99425	-113.363
2026	0	0	0	1.02593	0	0.87325	11.7889	-5.1608e-09	161.754	186.145	6.54888	0	5.02736	6.05329	0.771087	2.33381	-66.4288	7.52456	8.55049	6.59317	-106.77
2027	0	0	0	1.02616	0	0	0	0	161.754	186.145	9.63837	0	13.7265	14.7527	0.700988	5.17072	-61.2581	15.1872	16.2133	11.3653	-95.4043
2028	0	0	0	1.02593	0	0	0	0	161.754	186.145	9.63837	0	13.7267	14.7527	0.637262	4.70066	-56.5575	15.1873	16.2133	10.3321	-85.0722
2029	0	0	0	1.02616	0	0	0	0	161.754	186.145	9.63837	0	13.7265	14.7527	0.579329	4.27332	-52.2841	15.1872	16.2133	9.39285	-75.6794
2030	0	0	0	1.02593	0	0	0	0	161.754	186.145	9.63837	0	13.7267	14.7527	0.526663	3.88484	-48.3993	15.1873	16.2133	8.53891	-67.1405
2031	0	0	0	1.02616	0	0	0	0	161.754	186.145	9.63837	0	13.7265	14.7527	0.478784	3.53167	-44.8676	15.1872	16.2133	7.76269	-59.3778
2032	0	0	0	1.02593	0	0	0	0	161.754	186.145	9.63837	0	13.7267	14.7527	0.435258	3.21061	-41.657	15.1873	16.2133	7.05695	-52.3208
2033	0	0	0	1.02616	0	0	0	0	161.754	186.145	9.63837	0	13.7265	14.7527	0.395689	2.91874	-38.7383	15.1872	16.2133	6.41544	-45.9054
2034	0	0	0	1.02593	0	0	0	0	161.754	186.145	9.63837	0	13.7267	14.7527	0.359718	2.6534	-36.0849	15.1873	16.2133	5.83219	-40.0732
2035	0	0	0	1.02616	0	0	0	0	161.754	186.145	9.63837	0	13.7265	14.7527	0.327016	2.41218	-33.6727	15.1872	16.2133	5.30202	-34.7712
2036	0	0	0	1.02593	0	0	0	0	161.754	186.145	9.63837	0	13.7267	14.7527	0.297287	2.19289	-31.4798	15.1873	16.2133	4.81999	-29.9512
2037	0	0	0	0.513078	0	0	0	0	161.754	186.145	9.63837	0	14.2396	14.7527	0.270261	1.99354	-29.4863	15.5207	16.0338	4.3333	-25.6179
2038	0	0	0	0	0	0	0	0	161.754	186.145	9.63837	0	14.7527	14.7527	0.245692	1.81231	-27.674	15.8542	15.8542	3.89524	-21.7226
2039	0	0	0	0	0	0	0	0	161.754	186.145	9.63837	0	14.7527	14.7527	0.223356	1.64755	-26.0264	15.8542	15.8542	3.54113	-18.1815
2040	0	0	0	0	0	0	0	0	161.754	186.145	9.63837	0	14.7527	14.7527	0.203051	1.49777	-24.5286	15.8542	15.8542	3.21921	-14.9623
2041	0	0	0	0	0	0	0	0	161.754	186.145	9.63837	0	14.7527	14.7527	0.184592	1.36161	-23.167	15.8542	15.8542	2.92655	-12.0357
2042	0	0	0	0	0	0	0	0	161.754	186.145	9.63837	0	14.7527	14.7527	0.167811	1.23783	-21.9292	15.8542	15.8542	2.6605	-9.37523
2043	0	0	0	0	0	0	0	0	161.754	186.145	9.63837	0	14.7527	14.7527	0.152555	1.1253	-20.8039	15.8542	15.8542	2.41864	-6.95659
2044	0	0	0	0	0	0	0	0	161.754	186.145	9.63837	0	14.7527	14.7527	0.138687	1.023	-19.7809	15.8542	15.8542	2.19876	-4.75783
2045	0	0	0	0	0	0	0	0	161.754	186.145	9.63837	0	14.7527	14.7527	0.126079	0.93	-18.8509	15.8542	15.8542	1.99888	-2.75895
2046	0	0	-8.23854	0	0	0	0	0	161.754	186.145	9.63837	0	14.7527	22.9912	0.114617	1.31759	-17.5333	15.8542	24.0927	2.76144	0.00248459
