# Supplementary material for: Renewable linear alpha-olefins by base-catalyzed dehydration of biologically-derived fatty alcohols
Source: Royal Society of Chemistry journal article supplement (doi:10.1039/d1gc00243k), 2021-01-01
Supplement: d1gc00243k2.xlsx [file d1gc00243k2.xlsx]

## Sheet: Tables S8-S24
Table S8. Design requirements and capital cost of the dehydration reactor at the baseline fermentation performance scenario.
Adiabatic Fixedbed Gas Reactor		Units	R102
Design	Catalyst weight	kg	838778
	Volume	ft^3	11177.8
	Vessel type		Vertical
	Length	ft	38.4688
	Diameter	ft	19.2344
	Weight	lb	57606
	Wall thickness	in	0.396965
	Vessel material		Stainless steel 304
Purchase cost	Vertical pressure vessel	USD	298773
	Catalyst	USD	8.12776e+06
Total purchase cost		USD	8.42653e+06
Installed equipment cost		USD	9.37065e+06
Table S9. Design requirements and capital cost of the co-heat and power generation system at the baseline fermentation performance scenario.
Boiler turbogenerator		Units	BT
Power	Rate	kW	-14296.6
Medium pressure steam	Duty	kJ/hr	-1.50932e+08
	Flow	kmol/hr	-4713.14
Low pressure steam	Duty	kJ/hr	-972984
	Flow	kmol/hr	-25.0652
High pressure steam	Duty	kJ/hr	-3.01341e+07
	Flow	kmol/hr	-2299.29
Cooling water	Duty	kJ/hr	-9.53785e+06
	Flow	kmol/hr	6518.11
Design	Flow rate	kg/hr	171067
	Work	kW	15013.3
Purchase cost	Boiler	USD	2.40782e+07
	Deaerator	USD	259110
	Amine addition pkg	USD	33981.6
	Hot process water softener system	USD	66264.2
	Turbogenerator	USD	5.26303e+06
Total purchase cost		USD	2.97006e+07
Installed equipment cost		USD	5.3772e+07
Table S10. Design requirements and capital cost of the corn steep liquor mixing tank at the baseline fermentation performance scenario.
CSL Tank		Units	T103
Power	Rate	kW	71.8608
Design	Total feed flow rate	kg/hr	12784.7
Purchase cost	Tank	USD	359179
	Pump	USD	19213.6
	Agitator	USD	69823.3
Total purchase cost		USD	448216
Installed equipment cost		USD	1.09816e+06
Table S11. Capital investment of tridacane solvent for the plant lifetime at the baseline fermentation performance scenario.
Chemical Capital Investment		Units	CCI
Design	Volume		51124.5
Purchase cost	Chemical	USD	3.29267e+07
Total purchase cost		USD	3.29267e+07
Installed equipment cost		USD	3.29267e+07
Table S12. Design requirements and capital cost of the chilled water package at the baseline fermentation performance scenario.
Chilled Water Package		Units	CWP
Power	Rate	kW	1998.67
Cooling water	Duty	kJ/hr	-4.61761e+07
	Flow	kmol/hr	31556.5
Chilled water	Duty	kJ/hr	4.61761e+07
	Flow	kmol/hr	-30602.4
Design	Duty	kJ/hr	-4.61761e+07
Purchase cost	Chilled water package	USD	1.19896e+06
Total purchase cost		USD	1.19896e+06
Installed equipment cost		USD	1.79844e+06
Table S13. Design requirements and capital cost of the cooling tower at the baseline fermentation performance scenario.
Cooling Tower		Units	CT
Power	Rate	kW	640.205
Cooling water	Duty	kJ/hr	1.96033e+08
	Flow	kmol/hr	-136201
Design	Total feed flow rate	kmol/hr	136201
Purchase cost	Cooling tower	USD	528257
	Cooling water pump	USD	94662.1
Total purchase cost		USD	622920
Installed equipment cost		USD	1.08584e+06
Table S14. Design requirements and capital cost of the diamonium phosphate mixing tank at the baseline fermentation performance scenario.
DAP Tank		Units	T106
Power	Rate	kW	47.8225
Design	Total feed flow rate	kg/hr	1740.48
Purchase cost	Tank	USD	581878
	Pump	USD	21687.1
	Agitator	USD	34814.6
	Bag unloader	USD	135053
Total purchase cost		USD	773433
Installed equipment cost		USD	1.39642e+06
Table S15. Design requirements and capital costs of divided distillation units at the baseline fermentation performance scenario.
Divided Distillation Column		Units	D101	D102
Cooling water	Duty	kJ/hr	-8.78641e+07	-3.103e+07
	Flow	kmol/hr	60045.9	21205.7
Medium pressure steam	Duty	kJ/hr	1.3462e+08	1.04285e+07
	Flow	kmol/hr	4203.75	325.649
Design	Theoretical feed stage		1	1
	Theoretical stages		21	47
	Minimum reflux	Ratio	2.75697	3.98809
	Reflux	Ratio	2.89482	4.18749
	Rectifier stages		1	1
	Stripper stages		33	69
	Rectifier height	ft	13.9964	13.9964
	Stripper height	ft	61.2284	114.364
	Rectifier diameter	ft	24.1725	11.7651
	Stripper diameter	ft	26.7404	7.62965
	Rectifier wall thickness	in	1	0.5
	Stripper wall thickness	in	1	0.375
	Rectifier weight	lb	105711	13538.3
	Stripper weight	lb	289746	45247.4
Purchase cost	Rectifier trays	USD	0	0
	Stripper trays	USD	2.04326e+06	184655
	Rectifier tower	USD	553333	161496
	Stripper tower	USD	1.23949e+06	419452
	Condenser	USD	193389	143648
	Boiler	USD	1.94061e+06	244151
Total purchase cost		USD	5.97008e+06	1.1534e+06
Installed equipment cost		USD	2.32599e+07	4.51393e+06
Table S16. Design requirements and capital costs of distillation units at the baseline fermentation performance scenario.
Distillation Column		Units	D103	D104
Cooling water	Duty	kJ/hr	-287299	-1.37103e+06
	Flow	kmol/hr	196.339	936.955
Medium pressure steam	Duty	kJ/hr	3.08391e+06	2.79998e+06
	Flow	kmol/hr	96.3007	87.4346
Design	Theoretical feed stage		1	9
	Theoretical stages		39	41
	Minimum reflux	Ratio	0.3	1.27606
	Reflux	Ratio	0.315	1.33987
	Actual stages		69	61
	Height	ft	112.888	101.08
	Diameter	ft	2.99792	3.72963
	Wall thickness	in	1.125	0.75
	Weight	lb	52424.6	38695.1
Purchase cost	Trays	USD	67693.7	68644.1
	Tower	USD	383765	331180
	Condenser	USD	4814.85	5130.31
	Boiler	USD	5645.98	5955
Total purchase cost		USD	461920	410909
Installed equipment cost		USD	1.9601e+06	1.7392e+06
Table S17. Design requirements and capital cost of the fatty alcohol bioreactor at the baseline fermentation performance scenario.
Fatty Alcohol Bioreactor		Units	R101
Power	Rate	kW	1371.03
	Duty	kJ/hr	-4.61761e+07
Chilled water	Flow	kmol/hr	30602.4
	Reactor volume	m3	7248.99
Design	Batch time	hr	39.2258
	Loading time	hr	1.22581
	Number of reactors		32
	Reactor duty	kJ/hr	4.61761e+07
	Cleaning and unloading time	hr	3
	Working volume fraction		0.9
	Heat exchangers	USD	469097
Purchase cost	Reactors	USD	4.06422e+07
	Agitators	USD	2.5281e+06
	Cleaning in place	USD	676064
		USD	4.43154e+07
Total purchase cost		USD	6.70043e+07
Installed equipment cost
Table S18. Design requirements and capital costs of heat exchangers at the baseline fermentation performance scenario.
Heat Exchanger		Units	H101	H102	H103	H104	H105	H106	H107	H108	H109
Low pressure steam	Duty	kJ/hr	972984	0	0	0	0	0	0	0	0
	Flow	kmol/hr	25.0652	0	0	0	0	0	0	0	0
High pressure steam	Duty	kJ/hr	0	0	3.01341e+07	0	0	0	0	0	0
	Flow	kmol/hr	0	0	2299.29	0	0	0	0	0	0
Cooling water	Duty	kJ/hr	0	0	0	0	-7.68569e+06	-932821	-1.55989e+06	0	-9.58866e+06
	Flow	kmol/hr	0	0	0	0	7485.96	637.485	1066.02	0	6552.84
Design	Area	ft^2	54.153	223962	11303.6	389781	5279.78	406.262	273.507	835.875	1362.28
	Overall heat transfer coefficient	kW/m^2/K	0.5	1	0.5	0.5	0.5	0.5	0.5	0.5	0.5
	Log-mean temperature difference	K	102.063	11.8281	15.1434	5.90455	8.9688	14.8881	35.9655	20.7943	44.1648
	Fouling correction factor		1	1	1	1	0.970496	0.922176	0.948204	1	0.95296
	Tube side pressure drop	psi	1.5	1.5	1.5	5	5	1.5	1.5	5	1.5
	Shell side pressure drop	psi	5	1.5	3	5	5	5	5	1.5	5
	Operating pressure	psi	50.0138	73.5	2709.53	14.7	14.7	14.7	14.7	14.7	14.7
	Total tube length	ft	20	20	20	20	20	20	20	20	20
Total purchase cost		USD	4702.79	1.39029e+07	1.40331e+06	3.02721e+07	283734	86421.2	79990.3	107042	130532
Installed equipment cost		USD	8465.02	4.40721e+07	4.44848e+06	9.59624e+07	899435	273955	253569	339324	413785
Table S19. Design requirements and capital cost of liquid-liquid extraction centrifuge at the baseline fermentation performance scenario.
Liquid-Liquid Centrifuge		Units	C102	C103
Power	Rate	kW	1590.68	31.8025
Design	Total feed flow rate	m^3/hr	1136.2	22.716
	Number of centrifuges		12	1
Purchase cost	Centrifuges	USD	4.963e+06	182271
Total purchase cost		USD	4.963e+06	182271
Installed equipment cost		USD	1.00749e+07	370010
Table S20. Design requirements and capital cost of mixer-settlers at the baseline fermentation performance scenario.
Mixer Settler		Units	M104
Power	Rate	kW	115.226
Design	Mixer - Volume	m^3	115.226
	Mixer - Power	hp	154.518
	Mixer - Vessel type		Vertical
	Mixer - Length	ft	5.27416
	Mixer - Diameter	ft	5.27416
	Mixer - Weight	lb	1712.86
	Mixer - Wall thickness	in	0.3125
	Settler - Vessel type		Horizontal
	Settler - Length	ft	96.042
	Settler - Diameter	ft	24.0105
	Settler - Weight	lb	171763
	Settler - Wall thickness	in	0.464497
	Mixer - Number of agitators		3
Purchase cost	Mixer	USD	116199
	Settler	USD	4342.68
Total purchase cost		USD	120542
Installed equipment cost		USD	316893
Table S21. Design requirements and capital cost of pumps at the baseline fermentation performance scenario.
Pump		Units	P102	P104	P105	P106	P107	P108	P109
Power	Rate	kW	158.137	152.433	84.8922	161.63	160.358	102.498	158.136
Design	Ideal power	hp	167.085	160.706	85.7684	170.996	169.571	105.155	167.085
	Total feed flow rate	gpm	4872.86	4686.8	2501.34	4986.9	4945.36	3066.72	4872.84
	Efficiency		0.78791	0.786181	0.753409	0.788921	0.788557	0.76504	0.78791
	Actual power		212.061	204.413	113.84	216.746	215.04	137.45	212.061
	Pump power		250	250	125	250	250	150	250
	Number of pumps		1	5	2	1	1	2	1
	Head	ft	231.122	181.234	243.704	232.982	230.173	301.302	231.122
	Type		Centrifugal	Centrifugal	Centrifugal	Centrifugal	Centrifugal	Centrifugal	Centrifugal
Purchase cost	Pump	USD	463708	409503	48872.9	473767	468384	60798	463707
	Motor	USD	14770.5	14770.5	6326.48	14770.5	14770.5	7919.9	14770.5
Total purchase cost		USD	478479	424274	55199.4	488537	483154	68717.9	478477
Installed equipment cost		USD	1.57898e+06	1.4001e+06	182158	1.61217e+06	1.59441e+06	226769	1.57898e+06
Table S22. Design requirements and capital cost of the 3-phase decanter centrifuge at the baseline fermentation performance scenario.
3-Phase Decanter Centrifuge		Units	C101
Power	Rate	kW	7451.2
Design	Total feed flow rate	m^3/hr	5322.28
	Number of centrifuges		27
Purchase cost	Centrifuges	USD	1.70107e+07
Total purchase cost		USD	1.70107e+07
Installed equipment cost		USD	3.45318e+07
Table S23. Design requirements and capital cost of storage tanks at the baseline fermentation performance scenario.
Storage tank		Units	T101	T102	T104	T105	T108	T109	T110
Design	Residence time	hr	168	0.25	168	2	168	168	168
	Total volume	m^3	17.4577	276.679	6.90637	10644.6	622.53	776.194	2299.52
	Number of tanks		1	1	1	1	1	1	1
Purchase cost	Tanks	USD	73201	117636	71392.3	1.3531e+06	419413	469049	813492
Total purchase cost		USD	73201	117636	71392.3	1.3531e+06	419413	469049	813492
Installed equipment cost		USD	168362	270562	164202	3.11213e+06	964651	1.07881e+06	1.87103e+06
Table S24. Design requirements and capital cost of surge tanks at the baseline fermentation performance scenario.
Surge tank		Units	T107
Design	Residence time	hr	0.1
	Total volume	m^3	113.62
	Number of tanks		1
Purchase cost	Tanks	USD	89684.7
Total purchase cost		USD	89684.7
Installed equipment cost		USD	206275

## Sheet: Tables S25-S41
Table S25. Design requirements and capital cost of the dehydration reactor at the target fermentation performance scenario.
Adiabatic Fixedbed Gas Reactor		Units	R102
Design	Catalyst weight	kg	88571.3
	Volume	ft^3	1180.33
	Vessel type		Vertical
	Length	ft	18.1827
	Diameter	ft	9.09133
	Weight	lb	11989.6
	Wall thickness	in	0.4375
	Vessel material		Stainless steel 304
Purchase cost	Vertical pressure vessel	USD	106629
	Catalyst	USD	858256
Total purchase cost		USD	964885
Installed equipment cost		USD	1.30183e+06
Table S26. Design requirements and capital cost of the co-heat and power generation system at the target fermentation performance scenario.
Boiler turbogenerator		Units	BT
Power	Rate	kW	-3583.01
Medium pressure steam	Duty	kJ/hr	-3.16266e+07
	Flow	kmol/hr	-987.599
Low pressure steam	Duty	kJ/hr	-934347
	Flow	kmol/hr	-24.0698
High pressure steam	Duty	kJ/hr	-8.35644e+06
	Flow	kmol/hr	-637.611
Cooling water	Duty	kJ/hr	-2.38609e+06
	Flow	kmol/hr	1630.64
Design	Flow rate	kg/hr	41263.3
	Work	kW	3755.88
Purchase cost	Boiler	USD	1.0258e+07
	Deaerator	USD	110388
	Amine addition pkg	USD	14477.2
	Hot process water softener system	USD	28230.5
	Turbogenerator	USD	2.2918e+06
Total purchase cost		USD	1.27029e+07
Installed equipment cost		USD	2.29977e+07
Table S27. Design requirements and capital cost of the corn steep liquor mixing tank at the target fermentation performance scenario.
CSL Tank		Units	T103
Power	Rate	kW	6.66675
Design	Total feed flow rate	kg/hr	1186.07
Purchase cost	Tank	USD	67999.5
	Pump	USD	2867.78
	Agitator	USD	21267.3
Total purchase cost		USD	92134.6
Installed equipment cost		USD	217590
Table S28. Capital investment of tridacane solvent for the plant lifetime at the target fermentation performance scenario.
Chemical Capital Investment		Units	CCI
Design	Volume		9931.14
Purchase cost	Tridecane	USD	6.39615e+06
Total purchase cost		USD	6.39615e+06
Installed equipment cost		USD	6.39615e+06
Table S29. Design requirements and capital cost of the chilled water package at the target fermentation performance scenario.
Chilled Water Package		Units	CWP
Power	Rate	kW	1998.67
Cooling water	Duty	kJ/hr	-4.61761e+07
	Flow	kmol/hr	31556.5
Chilled water	Duty	kJ/hr	4.61761e+07
	Flow	kmol/hr	-30602.4
Design	Duty	kJ/hr	-4.61761e+07
Purchase cost	Chilled water package	USD	1.19896e+06
Total purchase cost		USD	1.19896e+06
Installed equipment cost		USD	1.79844e+06
Table S30. Design requirements and capital cost of the cooling tower at the target fermentation performance scenario.
Cooling Tower		Units	CT
Power	Rate	kW	257.681
Cooling water	Duty	kJ/hr	8.02182e+07
	Flow	kmol/hr	-54820.7
Design	Total feed flow rate	kmol/hr	54820.7
Purchase cost	Cooling tower	USD	279370
	Cooling water pump	USD	45707.4
Total purchase cost		USD	325077
Installed equipment cost		USD	560748
Table S31. Design requirements and capital cost of the diamonium phosphate mixing tank at the target fermentation performance scenario.
DAP Tank		Units	T106
Power	Rate	kW	3.91014
Design	Total feed flow rate	kg/hr	142.307
Purchase cost	Tank	USD	100838
	Pump	USD	2925.83
	Agitator	USD	9955
	Bag unloader	USD	30063.6
Total purchase cost		USD	143782
Installed equipment cost		USD	256619
Table S32. Design requirements and capital costs of divided distillation units at the target fermentation performance scenario.
Divided Distillation Column		Units	D101	D102
Cooling water	Duty	kJ/hr	-1.07353e+07	-3.50861e+06
	Flow	kmol/hr	7336.42	2397.77
Medium pressure steam	Duty	kJ/hr	2.39228e+07	1.82471e+06
	Flow	kmol/hr	747.033	56.9798
Design	Theoretical feed stage		1	1
	Theoretical stages		21	55
	Minimum reflux	Ratio	0.970489	0.481717
	Reflux	Ratio	1.01901	0.505803
	Rectifier stages		1	1
	Stripper stages		34	81
	Rectifier height	ft	13.9964	13.9964
	Stripper height	ft	62.7044	132.076
	Rectifier diameter	ft	8.39121	6.00092
	Stripper diameter	ft	9.71656	3.10414
	Rectifier wall thickness	in	0.4375	0.375
	Stripper wall thickness	in	0.4375	1.5
	Rectifier weight	lb	9983.05	22582.1
	Stripper weight	lb	39316.9	85212.5
Purchase cost	Rectifier trays	USD	0	0
	Stripper trays	USD	109325	91242.6
	Rectifier tower	USD	133221	197616
	Stripper tower	USD	354479	518468
	Condenser	USD	87322.1	81516.2
	Boiler	USD	311094	116043
Total purchase cost		USD	995441	1.00489e+06
Installed equipment cost		USD	3.83018e+06	4.09028e+06
Table S33. Design requirements and capital costs of distillation units at the target fermentation performance scenario.
Distillation Column		Units	D103	D104
Cooling water	Duty	kJ/hr	-286262	-1.37103e+06
	Flow	kmol/hr	195.63	936.955
Medium pressure steam	Duty	kJ/hr	3.07912e+06	2.79998e+06
	Flow	kmol/hr	96.151	87.4346
Design	Theoretical feed stage		1	9
	Theoretical stages		39	41
	Minimum reflux	Ratio	0.3	1.27606
	Reflux	Ratio	0.315	1.33987
	Actual stages		69	61
	Height	ft	112.888	101.08
	Diameter	ft	2.99792	3.72963
	Wall thickness	in	1.125	0.75
	Weight	lb	52424.6	38695.1
Purchase cost	Trays	USD	67693.7	68644.1
	Tower	USD	383765	331180
	Condenser	USD	4809.95	5130.31
	Boiler	USD	5644.53	5955
Total purchase cost		USD	461913	410909
Installed equipment cost		USD	1.96009e+06	1.7392e+06
Table S34. Design requirements and capital cost of the fatty alcohol bioreactor at the target fermentation performance scenario.
Fatty Alcohol Bioreactor		Units	R101
Power	Rate	kW	275.431
Chilled water	Duty	kJ/hr	-4.61761e+07
	Flow	kmol/hr	30602.4
Design	Reactor volume	m3	3584.68
	Batch time	hr	89.9167
	Loading time	hr	6.91667
	Number of reactors		13
	Reactor duty	kJ/hr	4.61761e+07
	Cleaning and unloading time	hr	3
	Working volume fraction		0.9
Purchase cost	Heat exchangers	USD	190571
	Reactors	USD	1.16107e+07
	Agitators	USD	722227
	Cleaning in place	USD	443089
Total purchase cost		USD	1.29665e+07
Installed equipment cost		USD	1.97161e+07
Table S35. Design requirements and capital costs of heat exchangers at the target fermentation performance scenario.
Heat Exchanger		Units	H101	H102	H103	H104	H105	H106	H107	H108	H109
Low pressure steam	Duty	kJ/hr	934347	0	0	0	0	0	0	0	0
	Flow	kmol/hr	24.0698	0	0	0	0	0	0	0	0
High pressure steam	Duty	kJ/hr	0	0	8.35644e+06	0	0	0	0	0	0
	Flow	kmol/hr	0	0	637.611	0	0	0	0	0	0
Cooling water	Duty	kJ/hr	0	0	0	0	-3.75329e+06	-929514	-1.55989e+06	0	-9.26597e+06
	Flow	kmol/hr	0	0	0	0	2564.98	635.225	1066.02	0	6332.31
Design	Area	ft^2	51.8778	14832.1	2109.91	12092.5	1724.65	403.629	273.507	837.412	1298.99
	Overall heat transfer coefficient	kW/m^2/K	0.5	1	0.5	0.5	0.5	0.5	0.5	0.5	0.5
	Log-mean temperature difference	K	102.308	17.6053	22.4979	15.471	14.1442	14.9302	35.9655	20.7561	44.7443
	Fouling correction factor		1	1	1	1	0.920015	0.922291	0.948204	1	0.953252
	Tube side pressure drop	psi	1.5	1.5	1.5	5	5	1.5	1.5	5	1.5
	Shell side pressure drop	psi	5	1.5	3	5	5	5	5	1.5	5
	Operating pressure	psi	50.0138	73.5	2709.53	14.7	14.7	14.7	14.7	14.7	14.7
	Total tube length	ft	20	20	20	20	20	20	20	20	20
Total purchase cost		USD	4670.6	648736	446908	537481	145895	86291.7	79990.3	107114	127791
Installed equipment cost		USD	8407.09	2.05649e+06	1.4167e+06	1.70381e+06	462488	273545	253569	339550	405096
Table S36. Design requirements and capital cost of liquid-liquid extraction centrifuge at the target fermentation performance scenario.
Liquid-Liquid Centrifuge		Units	C102	C103
Power	Rate	kW	161.007	31.5883
Design	Total feed flow rate	m^3/hr	115.005	22.5631
	Number of centrifuges		2	1
Purchase cost	Centrifuges	USD	621258	181565
Total purchase cost		USD	621258	181565
Installed equipment cost		USD	1.26115e+06	368578
Table S37. Design requirements and capital cost of mixer-settlers at the target fermentation performance scenario.
Mixer Settler		Units	M104
Power	Rate	kW	9.57046
Design	Mixer - Volume	m^3	9.57046
	Mixer - Power	hp	12.834
	Mixer - Vessel type		Vertical
	Mixer - Length	ft	2.30116
	Mixer - Diameter	ft	2.30116
	Mixer - Weight	lb	260.86
	Mixer - Wall thickness	in	0.25
	Settler - Vessel type		Horizontal
	Settler - Length	ft	27.6792
	Settler - Diameter	ft	6.91979
	Settler - Weight	lb	10448.6
	Settler - Wall thickness	in	0.375
	Mixer - Number of agitators		3
Purchase cost	Mixer	USD	23273.5
	Settler	USD	3378.26
Total purchase cost		USD	26651.7
Installed equipment cost		USD	78830.9
Table S38. Design requirements and capital cost of pumps at the target fermentation performance scenario.
Pump		Units	P102	P104	P105	P106	P107	P108	P109
Power	Rate	kW	16.8337	70.8431	20.516	20.1799	20.0135	20.2486	16.8336
Design	Ideal power	hp	13.7448	70.4205	17.3627	17.0295	16.8648	17.0976	13.7447
	Total feed flow rate	gpm	400.852	2053.74	506.366	496.647	491.843	498.632	400.851
	Efficiency		0.608879	0.741264	0.631099	0.629296	0.628388	0.629667	0.608878
	Actual power		22.574	95.0006	27.5119	27.0612	26.8382	27.1533	22.5739
	Pump power		25	100	30	30	30	30	25
	Number of pumps		1	1	1	1	1	1	1
	Head	ft	298.897	192.657	291.528	294.323	284.388	366.069	298.897
	Type		Centrifugal	Centrifugal	Centrifugal	Centrifugal	Centrifugal	Centrifugal	Centrifugal
Purchase cost	Pump	USD	13057.7	39822.4	14262.1	14175.6	14019	14873.7	13057.6
	Motor	USD	1132.75	4820.54	1325.42	1325.42	1325.42	1325.42	1132.75
Total purchase cost		USD	14190.4	44643	15587.5	15501	15344.4	16199.1	14190.4
Installed equipment cost		USD	46828.3	147322	51438.9	51153.3	50636.5	53457.1	46828.3
Table S39. Design requirements and capital cost of the 3-phase decanter centrifuge at the target fermentation performance scenario.
3-Phase Decanter Centrifuge		Units	C101
Power	Rate	kW	653.015
Design	Total feed flow rate	m^3/hr	466.439
	Number of centrifuges		3
Purchase cost	Centrifuges	USD	1.64939e+06
Total purchase cost		USD	1.64939e+06
Installed equipment cost		USD	3.34827e+06
Table S40. Design requirements and capital cost of storage tanks at the target fermentation performance scenario.
Storage Tank		Units	T101	T102	T104	T105	T108	T109	T110
Design	Residence time	hr	168	0.25	168	2	168	168	168
	Total volume	m^3	10.9111	22.7602	0.563463	932.881	622.273	776.194	2299.52
	Number of tanks		1	1	1	1	1	1	1
Purchase cost	Tanks	USD	72078.8	74109.9	70305	230120	419325	469049	813492
Total purchase cost		USD	72078.8	74109.9	70305	230120	419325	469049	813492
Installed equipment cost		USD	165781	170453	161701	529275	964449	1.07881e+06	1.87103e+06
Table S41. Design requirements and capital cost of surge tanks at the target fermentation performance scenario.
Surge Tank		Units	T107
Design	Residence time	hr	0.1
	Total volume	m^3	11.5005
	Number of tanks		1
Purchase cost	Tanks	USD	72179.8
Total purchase cost		USD	72179.8
Installed equipment cost		USD	166014
